# Supplementary material for: Synthesis of 5,5-difluoro-5-phosphono-pent-2-en-1-yl nucleosides as potential antiviral agents
Source: Royal Society of Chemistry journal article supplement (doi:10.1039/c7ra05153k), 2017-01-01

## Synthesis of 5,5-difluoro-5-phosphono-pent-2-en-1-yl nucleosides as potential antiviral agents

F. Chevrier,<sup>a</sup> Z. Chamas,<sup>a</sup> T. Lequeux,<sup>b</sup> E. Pfund,<sup>b</sup> G. Andrei,<sup>c</sup> R. Snoeck,<sup>c</sup> V. Roy<sup>a</sup> and L. A. Agrofoglio<sup>\*a</sup>

- a. Université d'Orléans et CNRS, ICOA, UMR 7311, F-45067, Orléans, France.  
E-mail : [luigi.agrofoglio@univ-orleans.fr](mailto:luigi.agrofoglio@univ-orleans.fr)
- b. Laboratoire de Chimie Moléculaire et Thio-organique, ENSICAEN, UNICAEN, UMR CNRS 6507 & FR 3038, Caen, France
- c. REGA Institute for Medical Research, Katholieke Universiteit Leuven, Leuven, Belgium

### Contents

|                                                    |     |
|----------------------------------------------------|-----|
| I. NMR Spectra of selected pyrimidine analogs..... | S2  |
| II. NMR Spectra of selected purine analogs.....    | S8  |
| III. NMR Spectra of ribavirin analog.....          | S11 |

# I. NMR Spectra of pyrimidine analogs

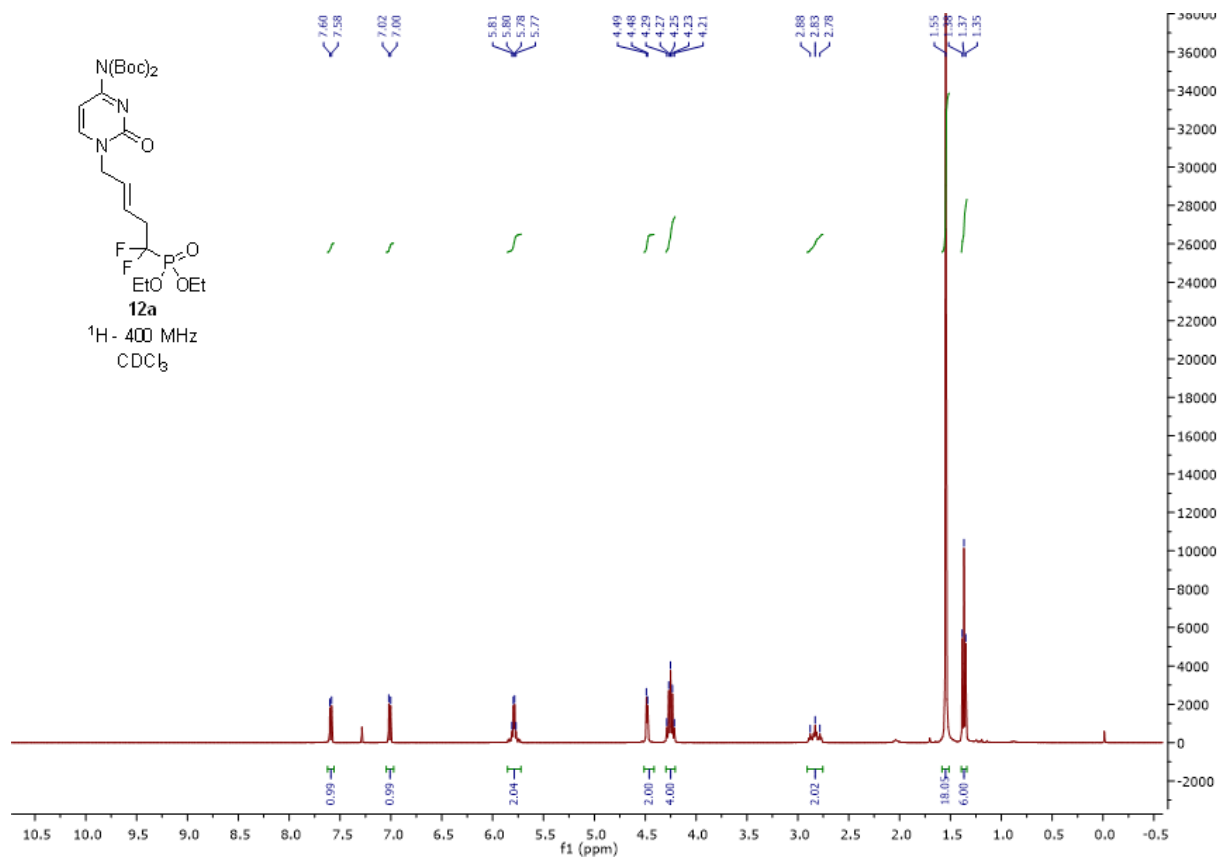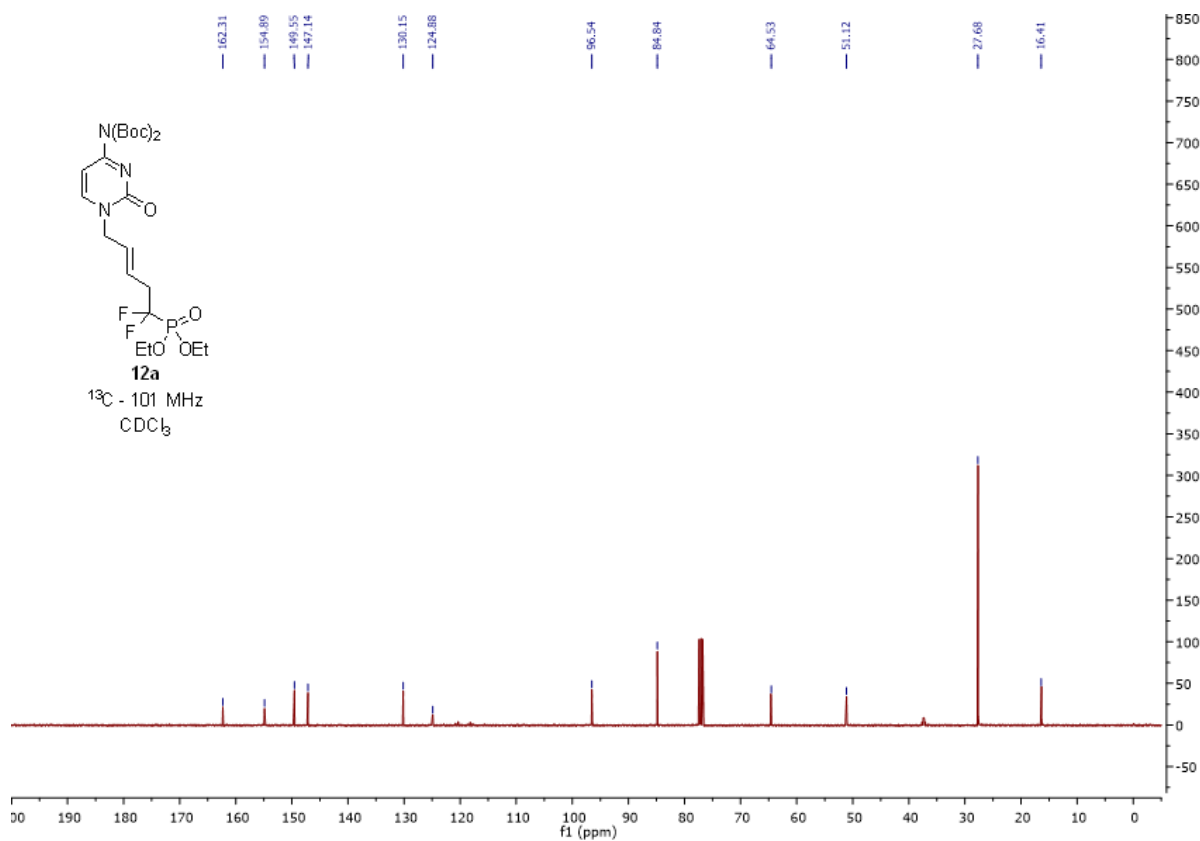

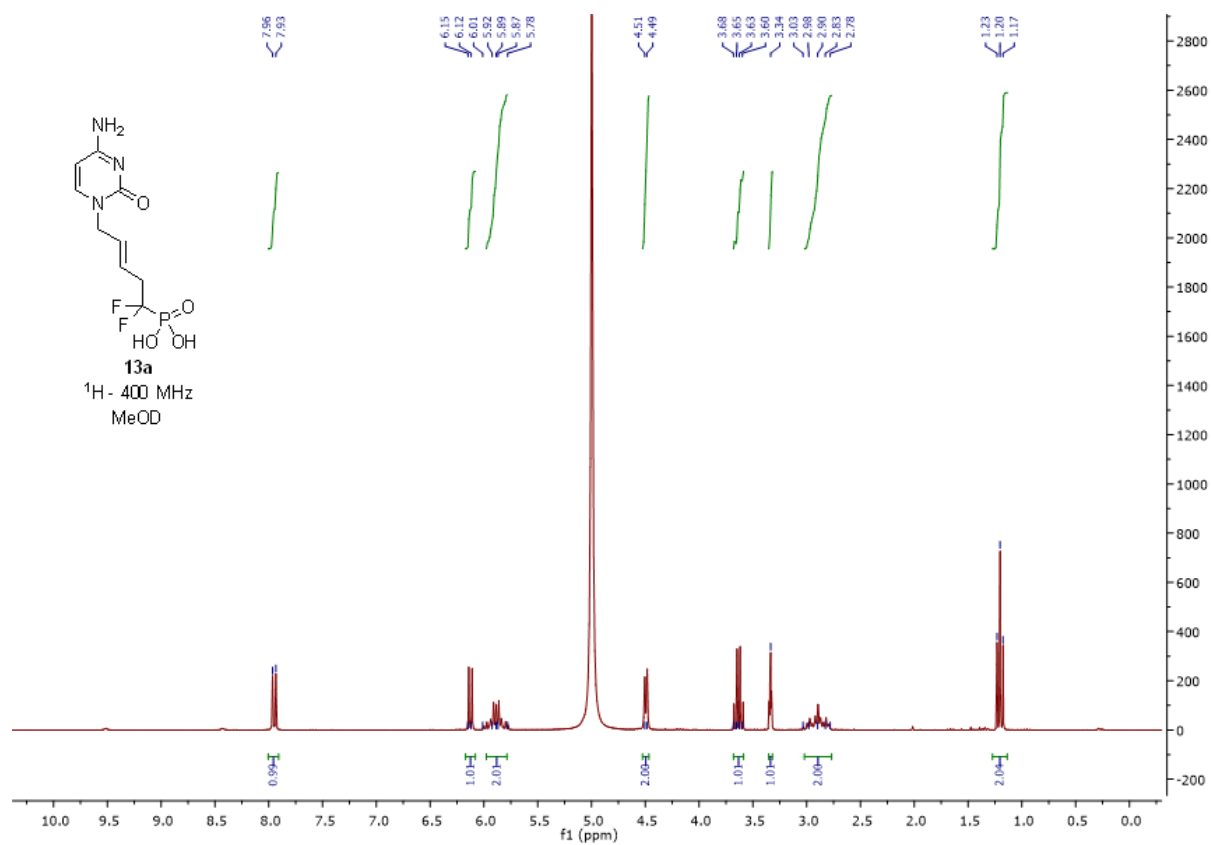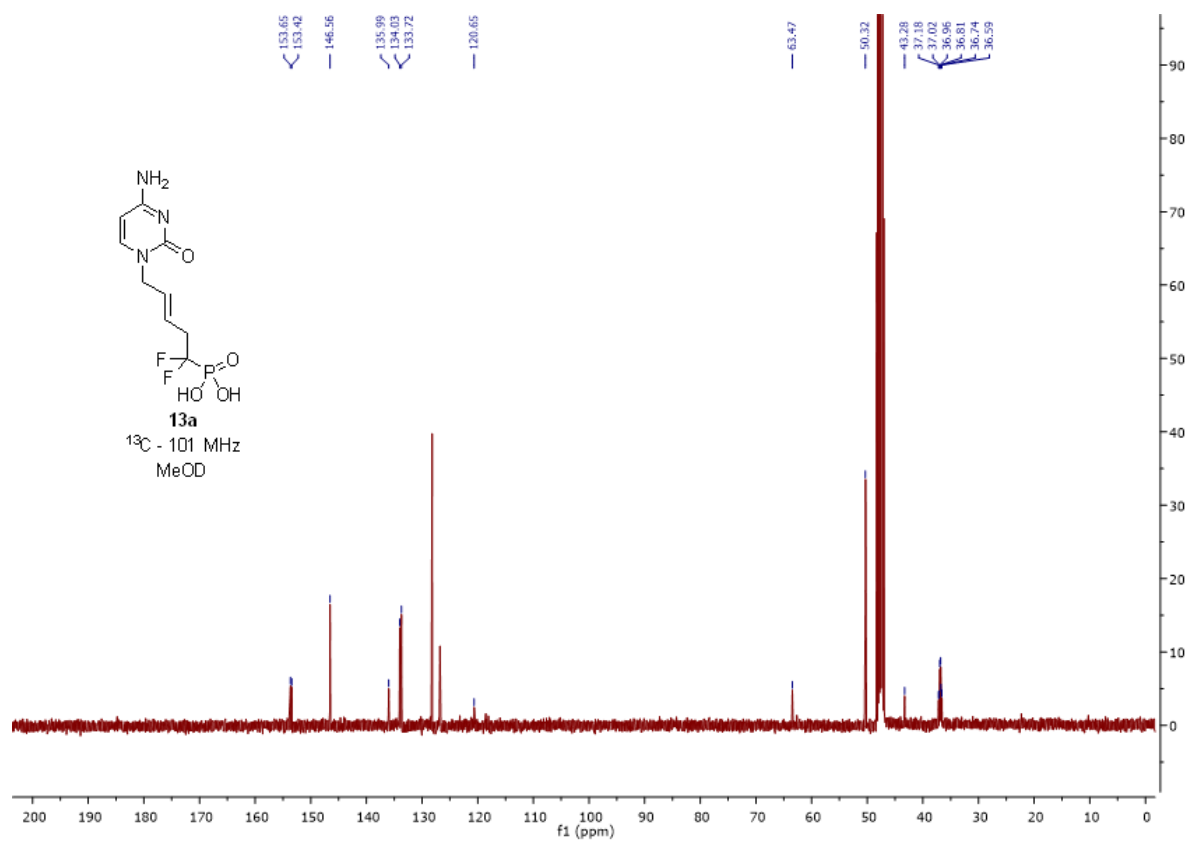

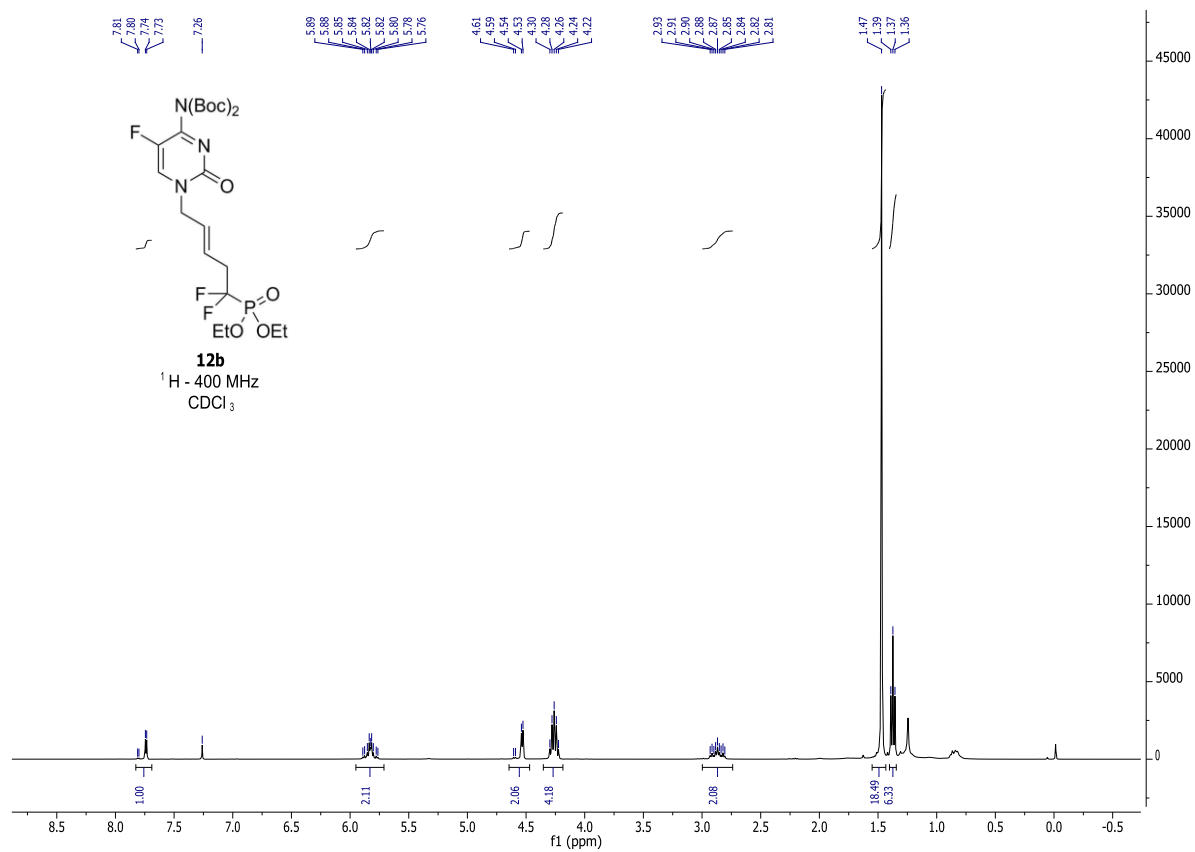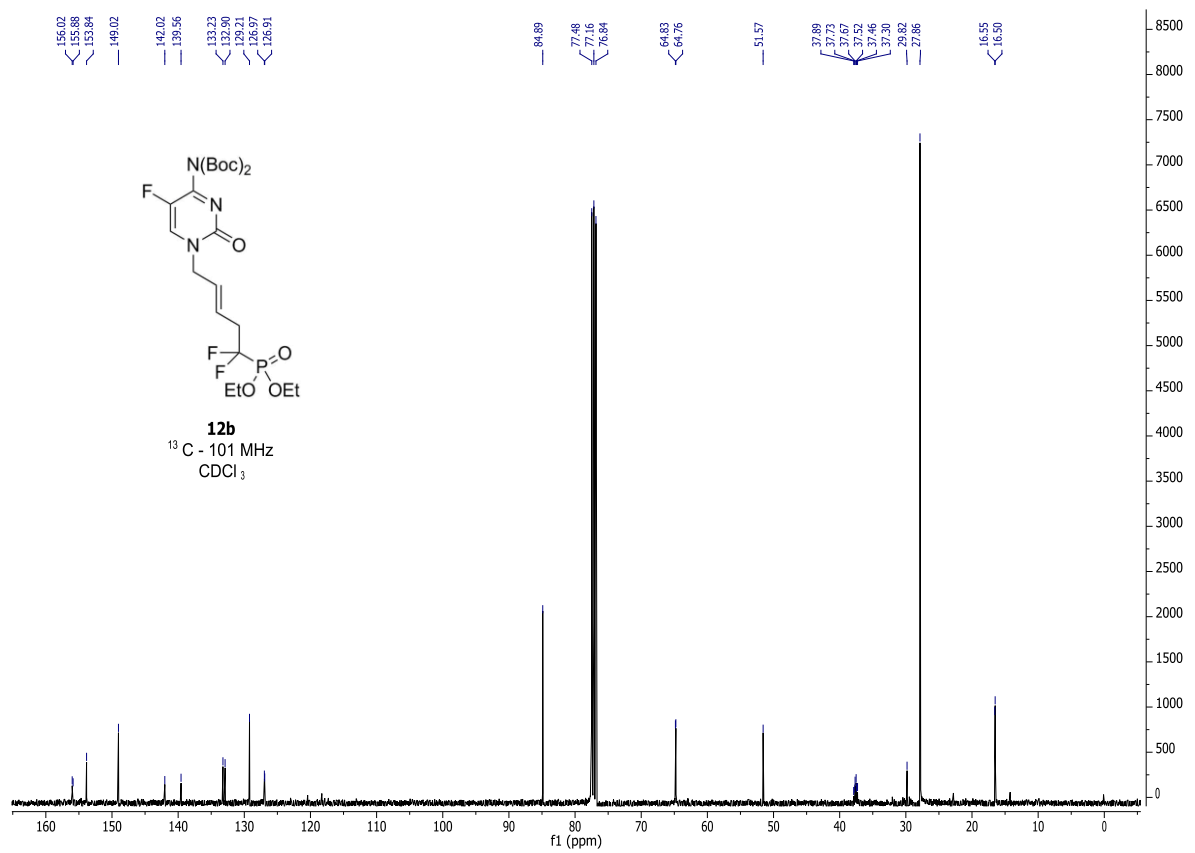

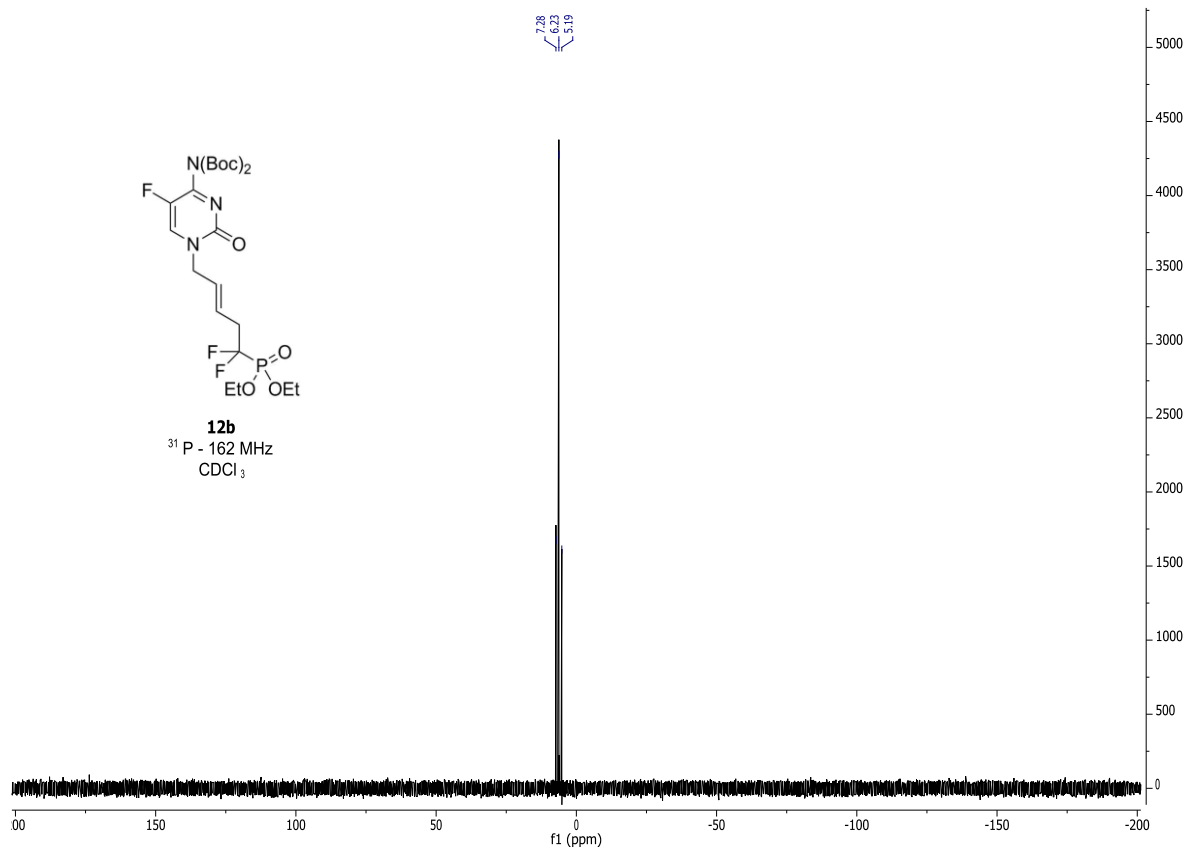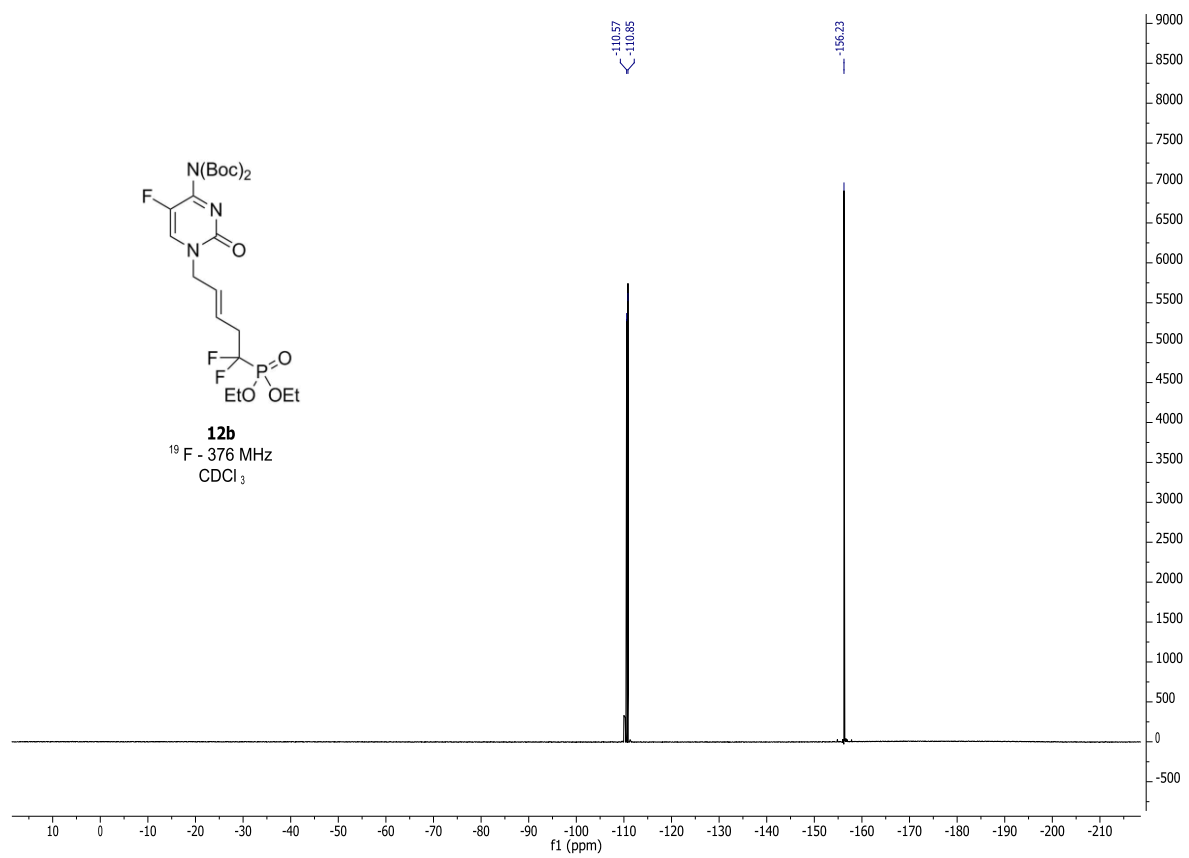

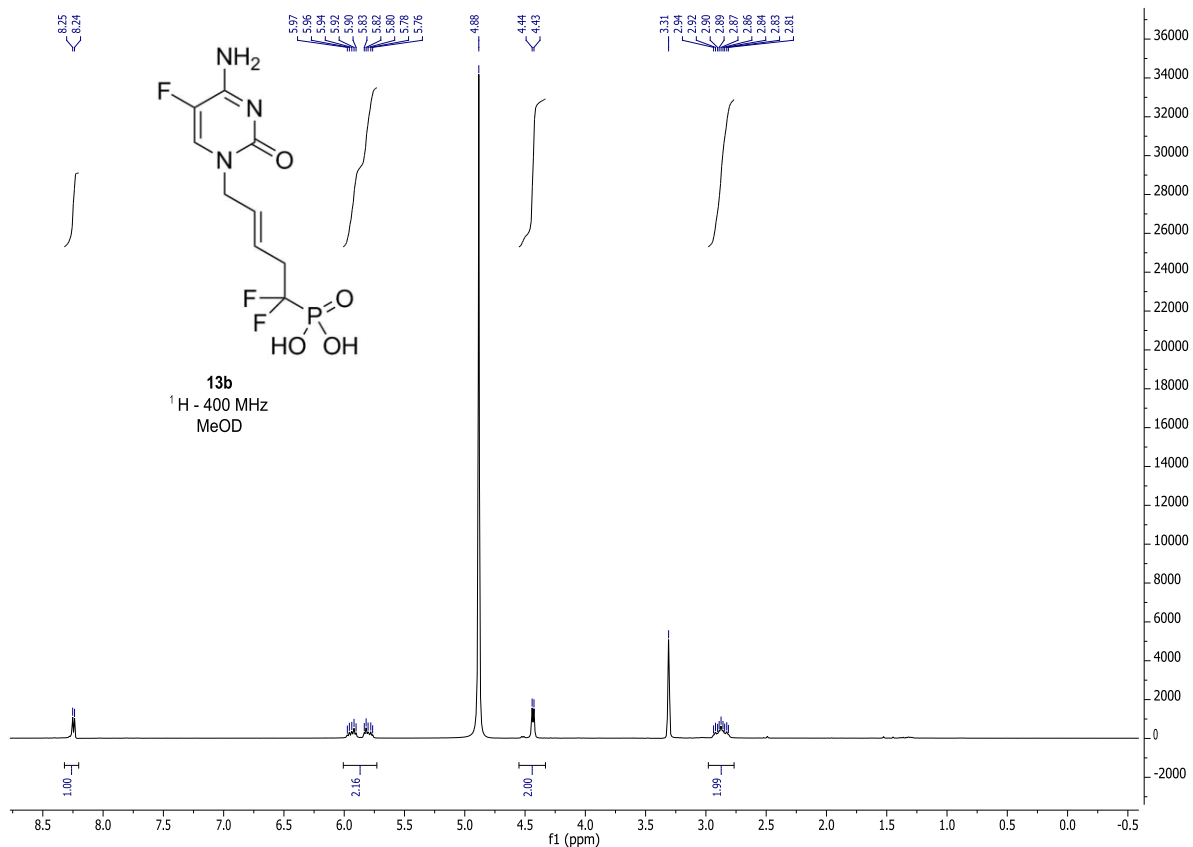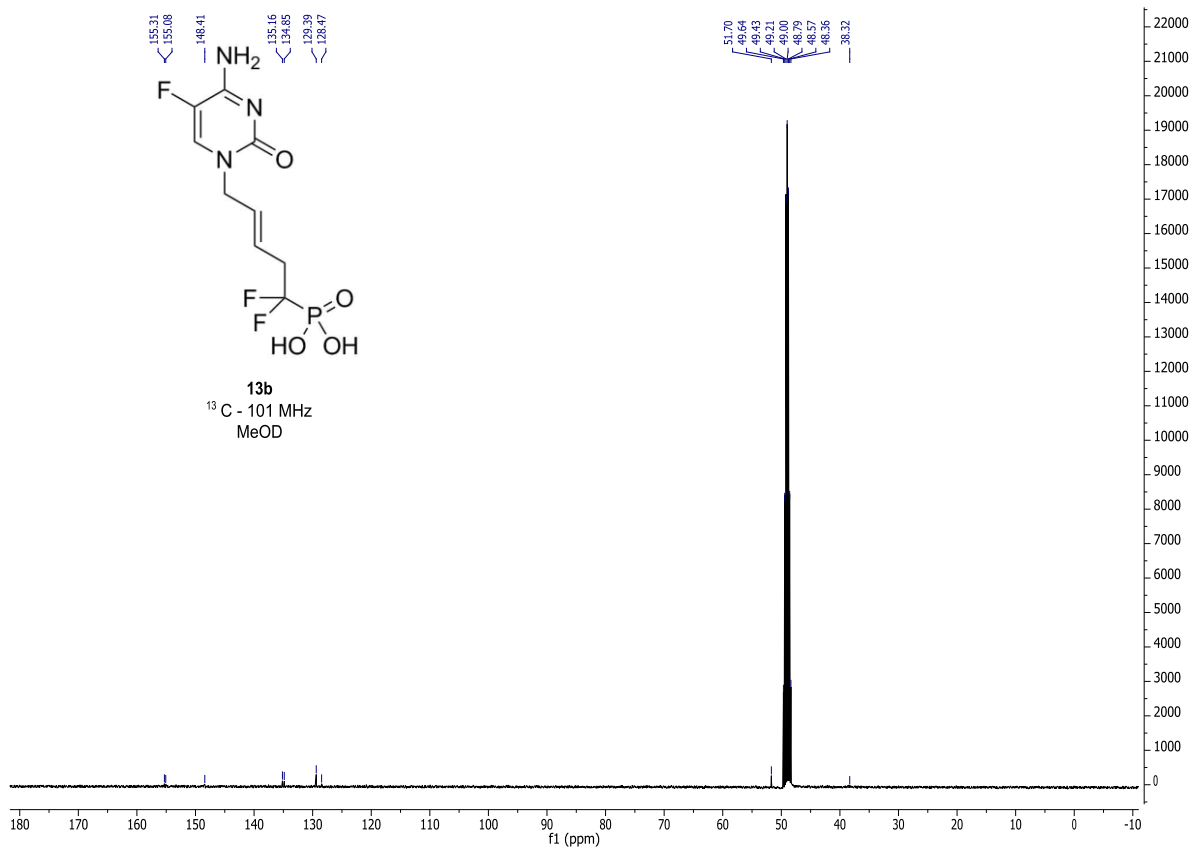

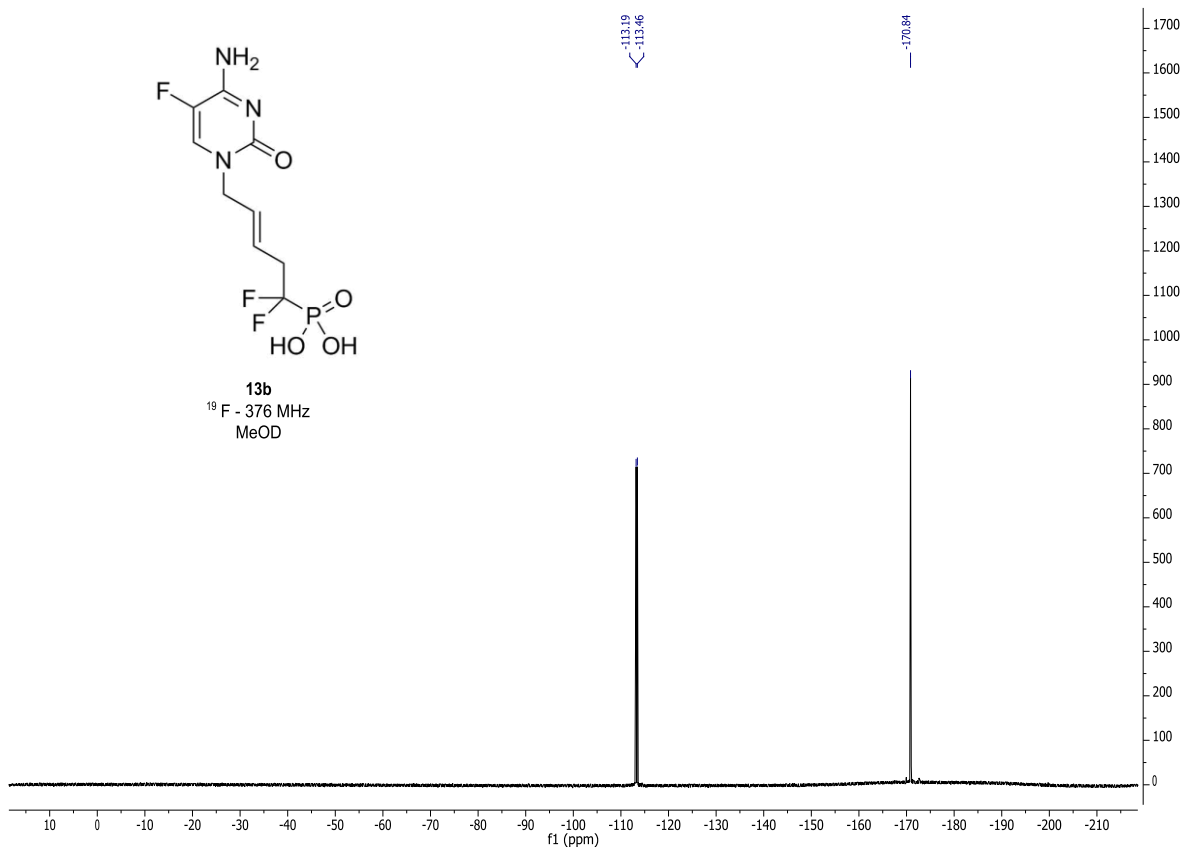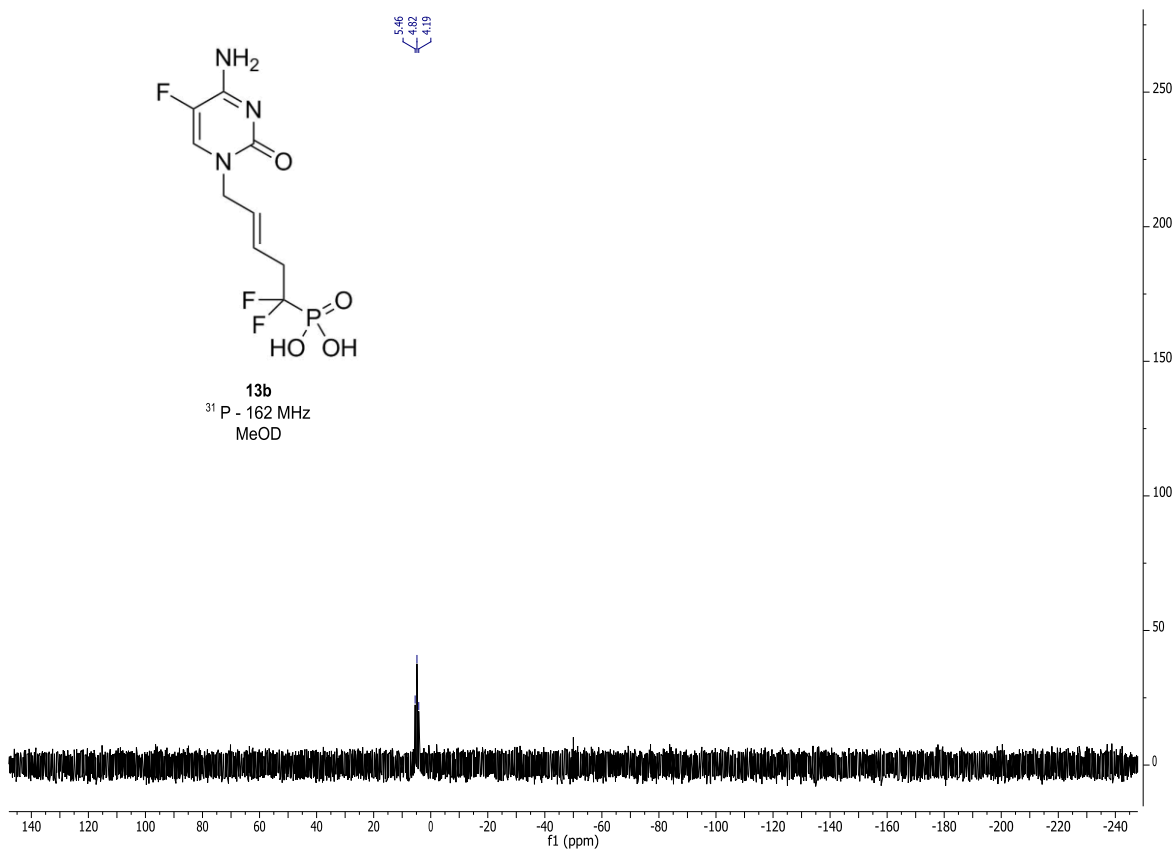

## II. NMR Spectra of selected purine analogs

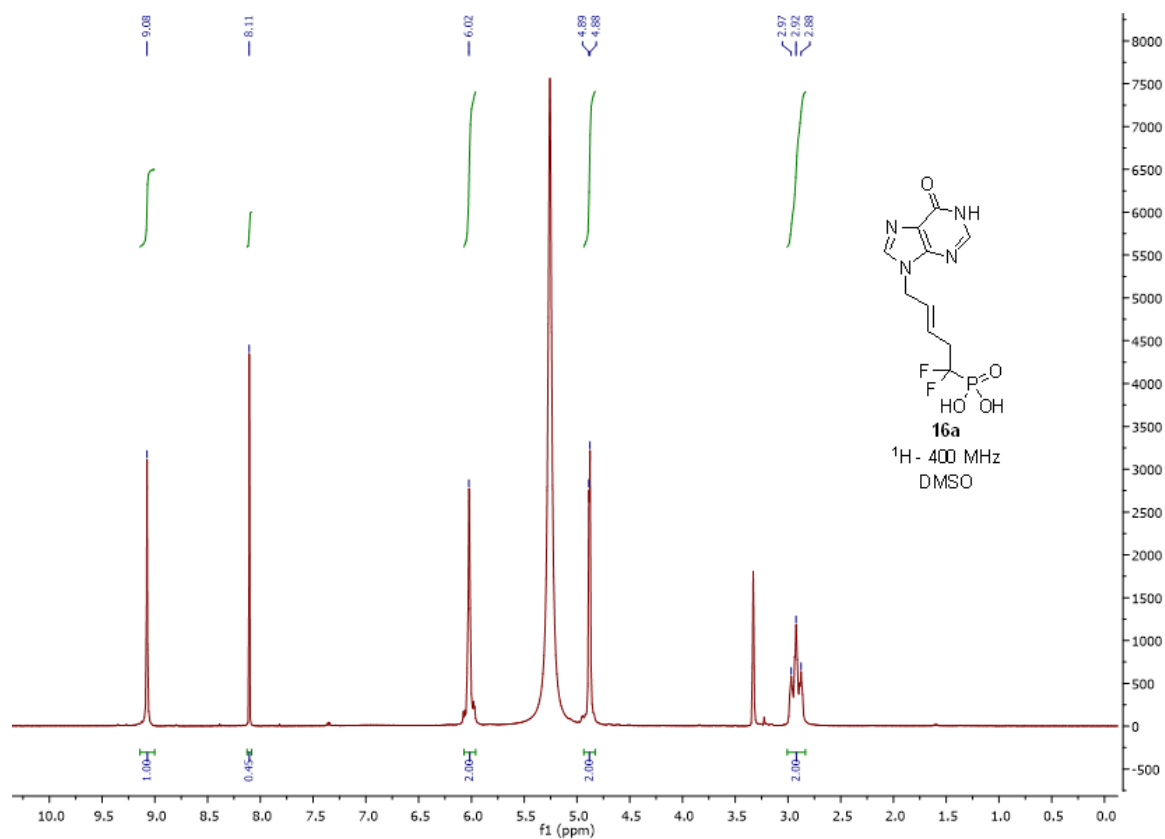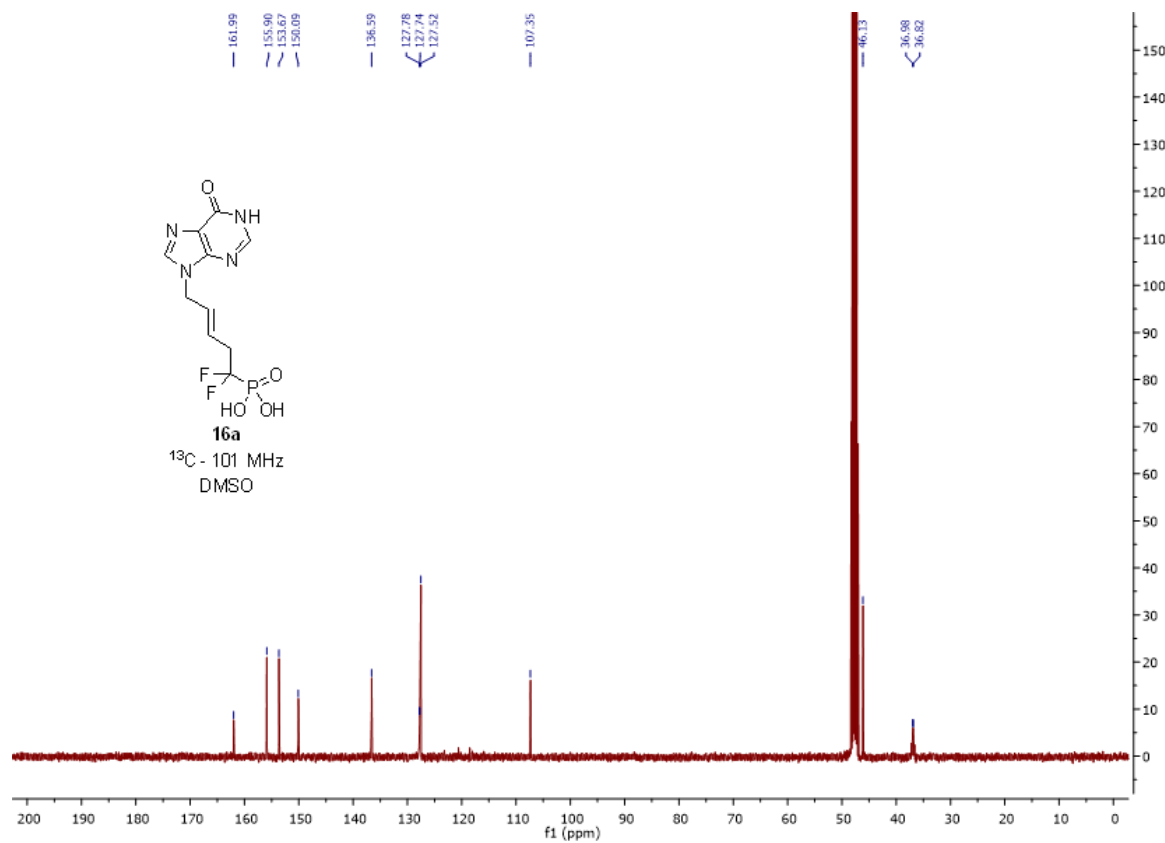



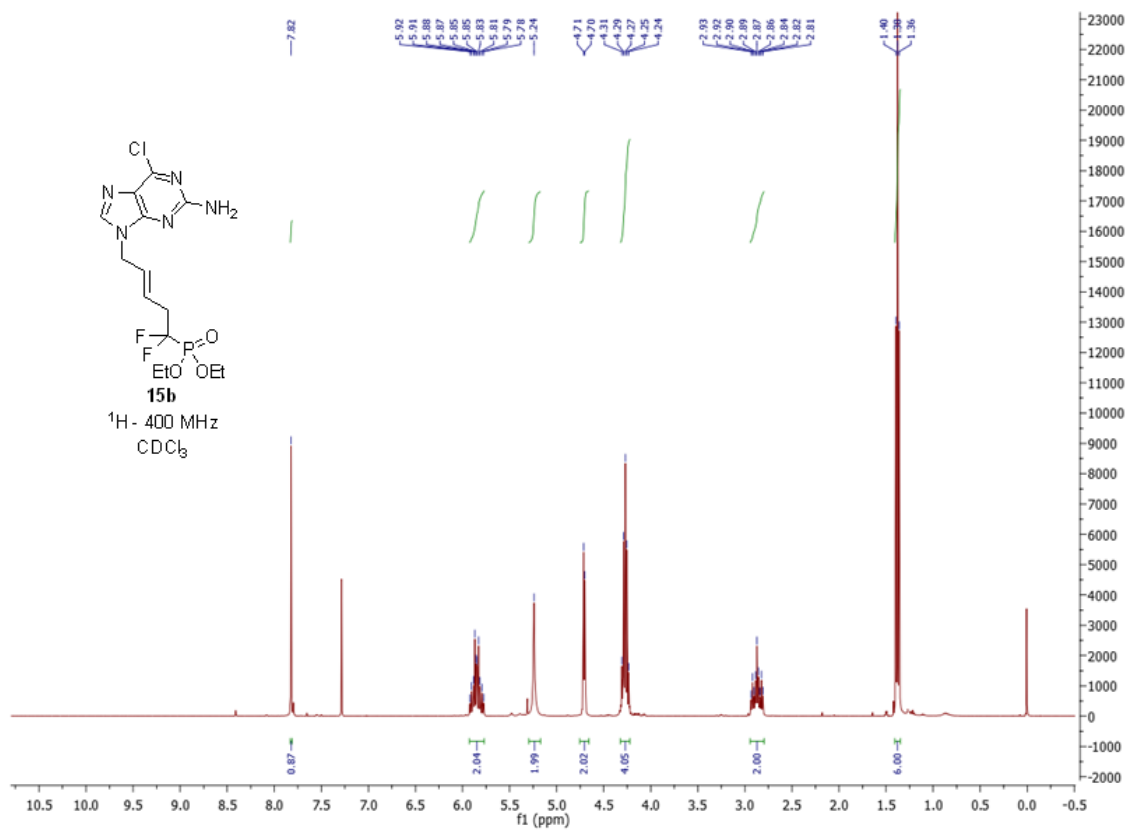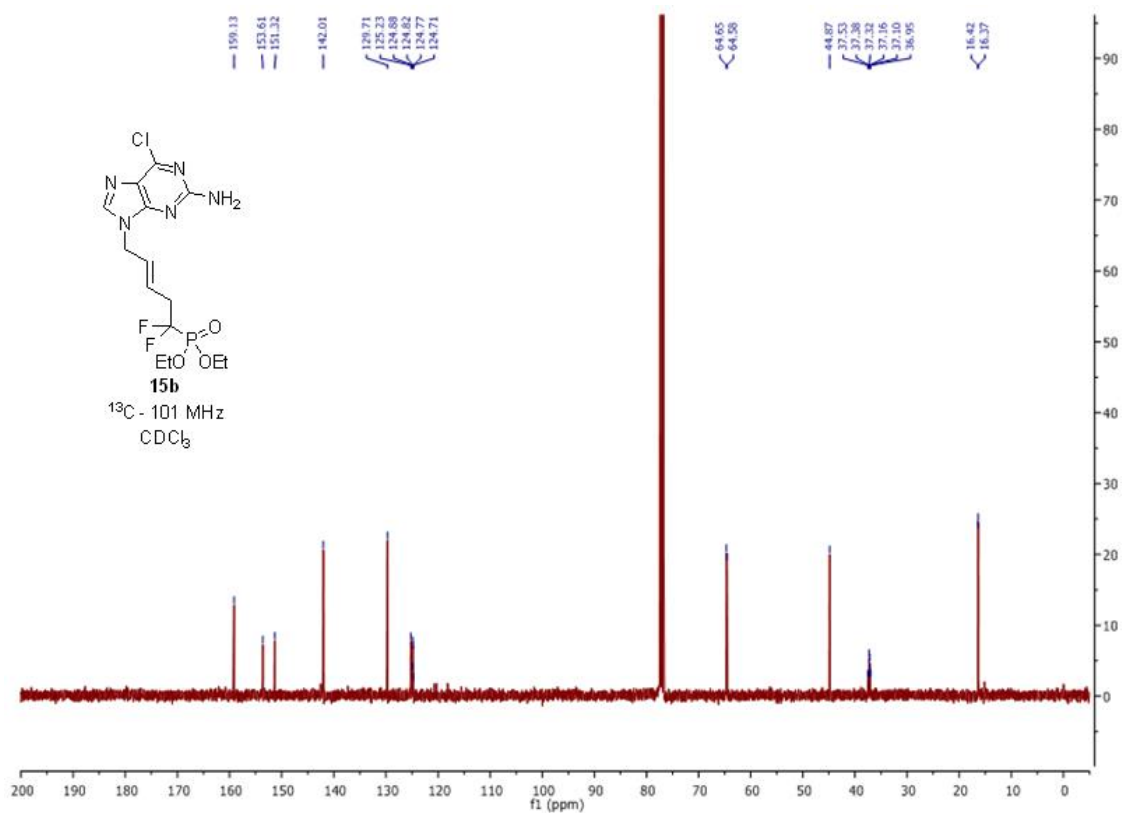

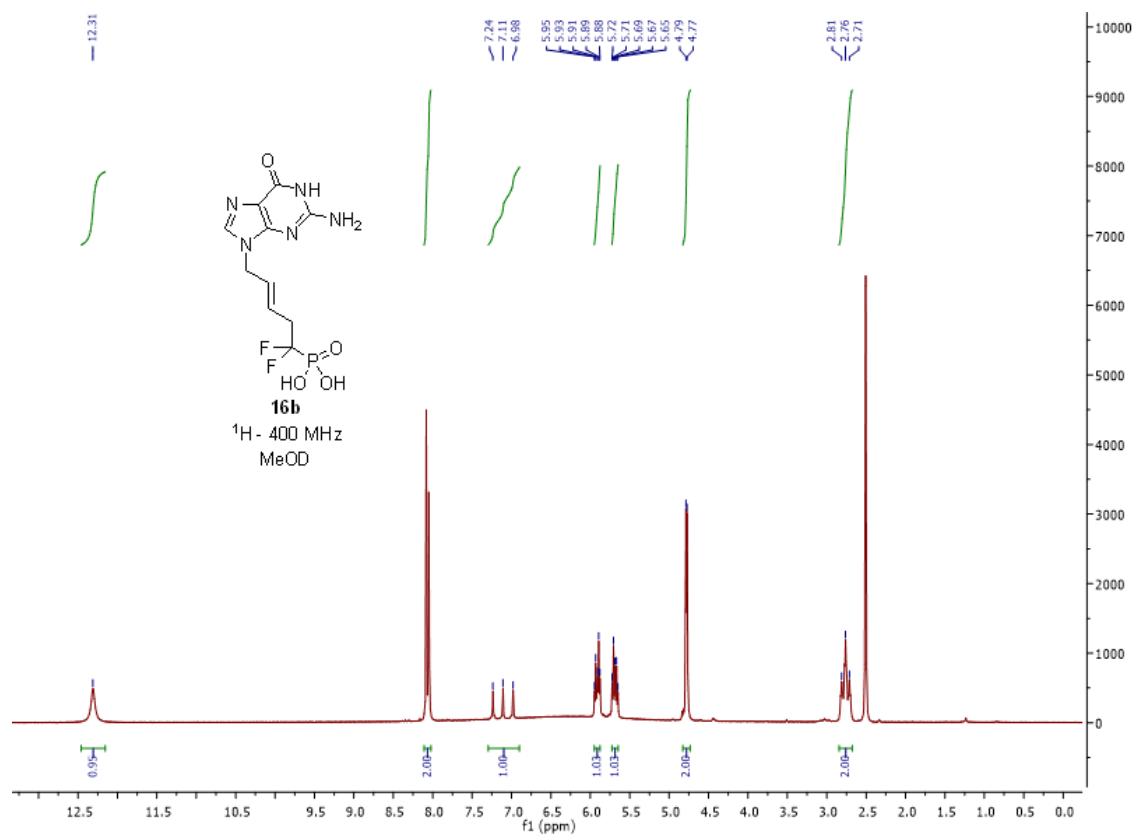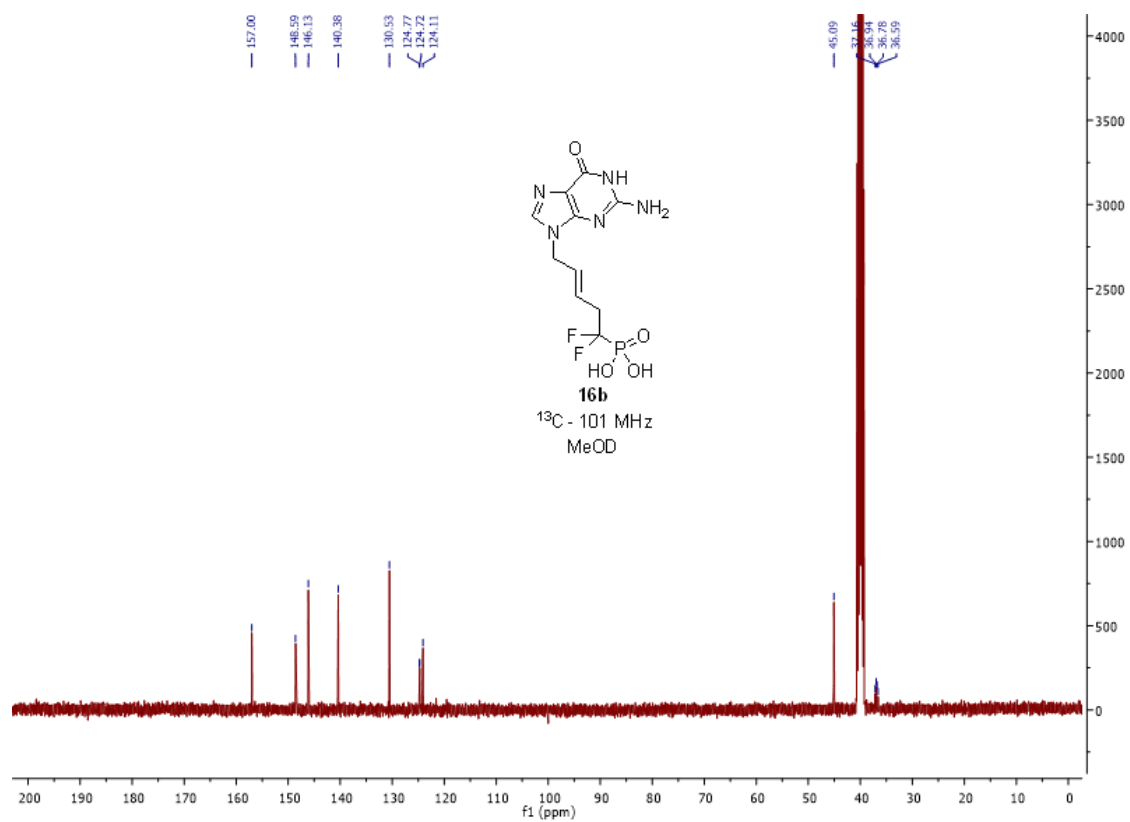

### III. NMR Spectra of ribavirin analog

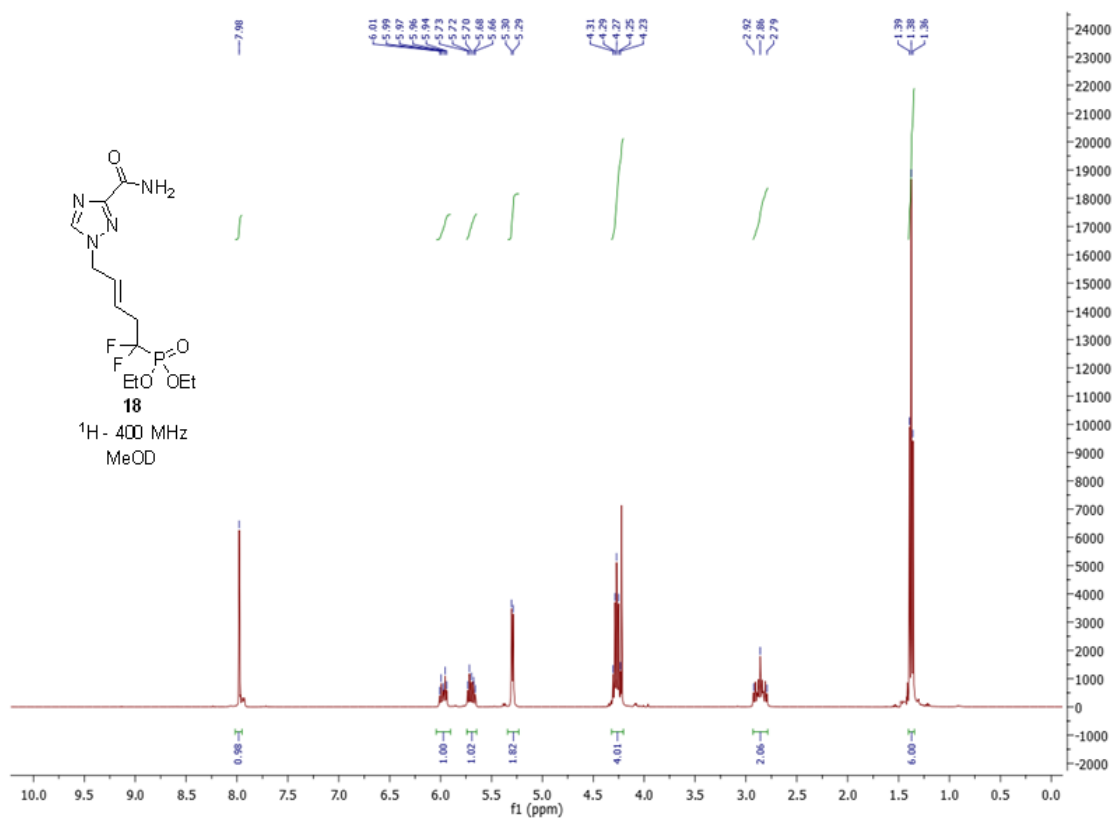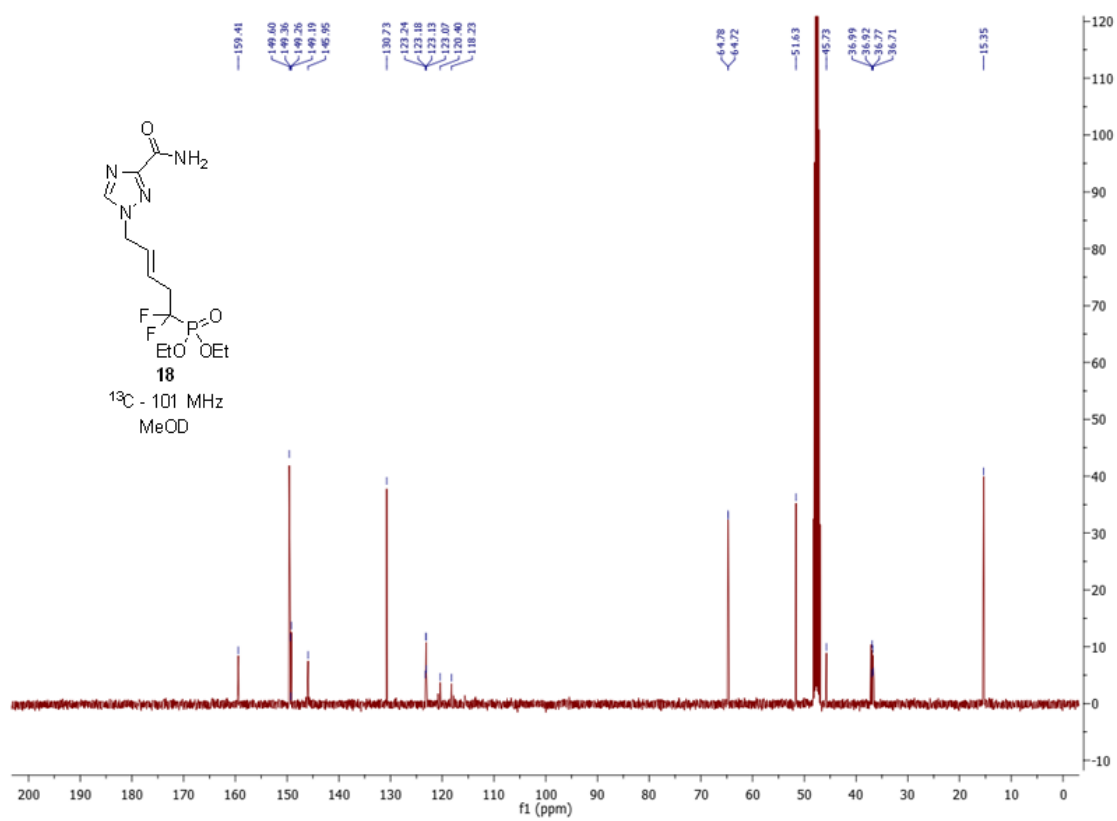

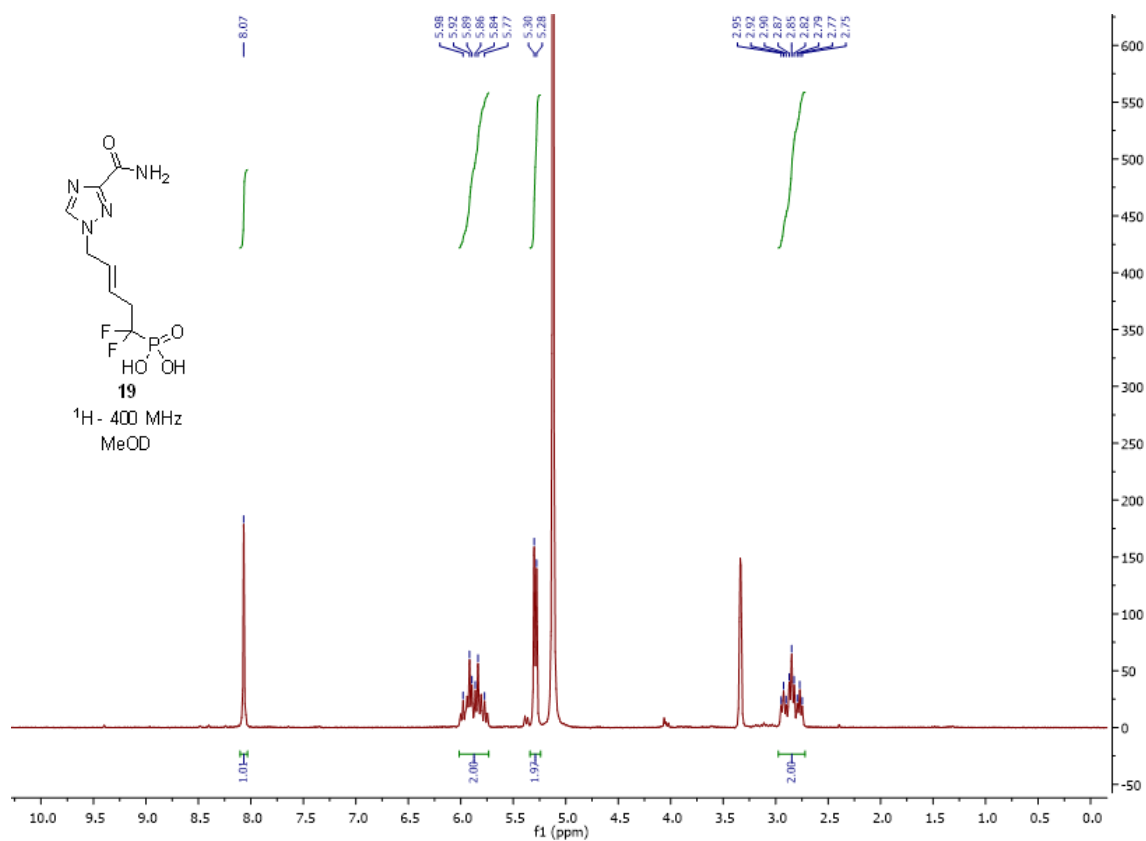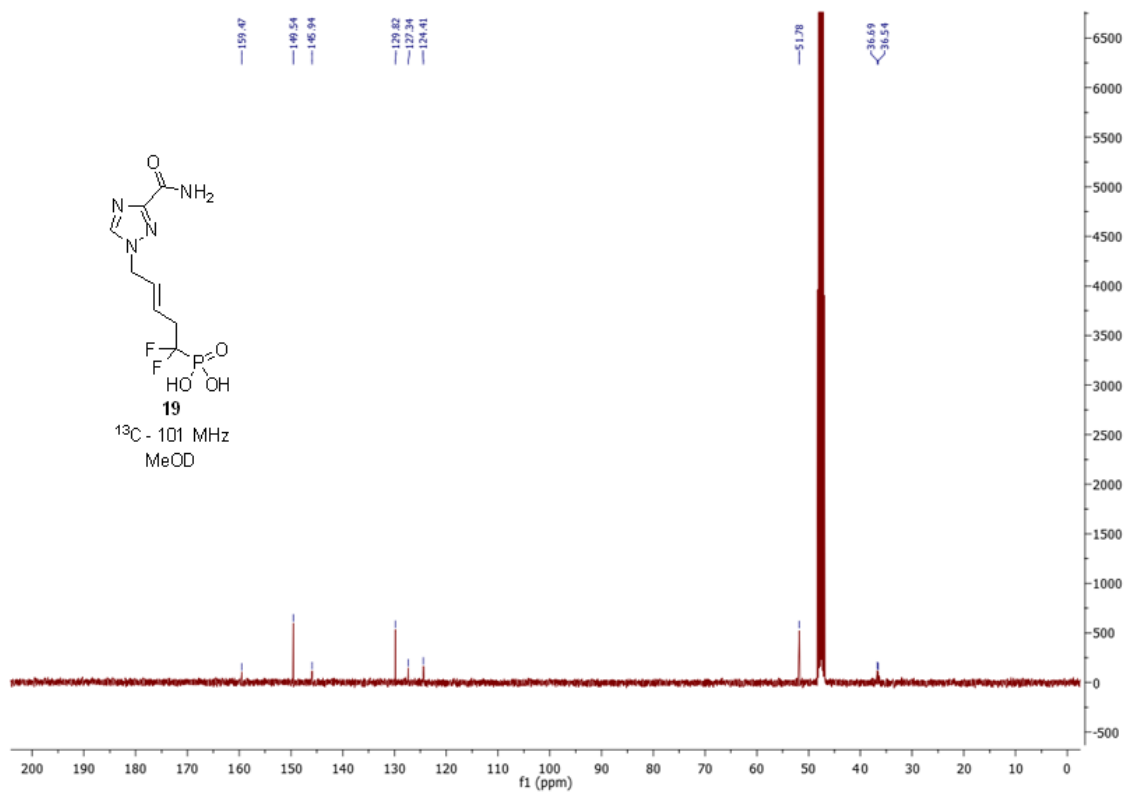

Supplement: c7ra05153k1.pdf [file c7ra05153k1.pdf]
